# Supplementary material
Source: PubMed Central journal article supplement (PMC5860627)
Supplement: kwx270wuwebmaterialfinal.pdf [file kwx270wuwebmaterialfinal.pdf]

## WEB MATERIAL

### Heterogeneity in Estimates of the Impact of Influenza on Population

#### Mortality: A Systematic Review

Li Li, Jessica Y. Wong, Peng Wu, Helen S. Bond, Eric H. Y. Lau, Sheena G. Sullivan, and Benjamin J. Cowling

#### Web Appendix 1. Derivation of the mortality estimates

For studies reporting estimates of the influenza-associated mortality rate for each influenza season or calendar year, we calculated the average estimates directly. For studies that provided the number of influenza-associated deaths for each influenza season or calendar year, we first searched for an estimate of the source population, then we calculated the influenza-associated mortality rate as:

$$\left( \sum_i \frac{ED_i}{pop_i} \right) / N_T$$

where  $ED_i$  represents the number of influenza-associated deaths of the  $i^{\text{th}}$  influenza season or calendar year, and  $pop_i$  represents the source population of the  $i^{\text{th}}$  influenza season or calendar year,  $N_T$  represents the number of influenza seasons or years. When the data by age group were available, we calculated the age-standardized influenza-associated mortality rate using the WHO world standard population (1) as the reference. For studies which did not provide a standard error for the estimate, we imputed the standard error using the following regression model:

$$\log(SE_i) = |MR_i| + age_i + COD_i \quad (1)$$

where  $SE_i$  is the standard error of the  $i^{\text{th}}$  estimate;  $|MR_i|$  represents the absolute value of the influenza-associated mortality rate of the  $i^{\text{th}}$  estimate;  $age_i$  represents the age group of the  $i^{\text{th}}$  estimate, and  $COD_i$  represents the cause of death of the  $i^{\text{th}}$  estimate.

**Web Table 1.** Basic Information on Included Articles

| Reference                   | Country or Region                                                                                                                   | Study Period | Statistical or Modeling Techniques <sup>s</sup> | Whether the Estimate Was for Seasonal Periods or Pandemic Periods, or Both | Influenza Activity Proxy <sup>#</sup>  | Cause of Death <sup>†</sup> | ICD Code(s) <sup>Δ</sup> | Age Group (years)          |
|-----------------------------|-------------------------------------------------------------------------------------------------------------------------------------|--------------|-------------------------------------------------|----------------------------------------------------------------------------|----------------------------------------|-----------------------------|--------------------------|----------------------------|
| Alling, 1981 (2)            | US                                                                                                                                  | 1968-1976    | GLM                                             | Seasonal and 1968 pandemic                                                 | The number of acute respiratory deaths | AC                          | -                        | ≥65, all ages              |
| Andreasen, 2011 (3)         | Denmark, Norway, Sweden, Italy, Netherlands, Spain, Sweden, US                                                                      | 1918-1920    | RD                                              | 1918 pandemic                                                              | N                                      | AC                          | -                        | 1-14, all ages             |
| Ansart, 2009 (4)            | Finland, England and Wales, Scotland, Denmark, Norway, France, Switzerland, Germany, Sweden, Netherlands, Spain, Portugal, Bulgaria | 1918-1919    | Serfling                                        | 1918 pandemic                                                              | N                                      | AC                          | -                        | All ages                   |
| Aungkulanon, 2015 (5)       | Thailand                                                                                                                            | 2006-2011    | GLM                                             | Seasonal and 2009 pandemic                                                 | LAB %                                  | P&I, Res, AC                | ICD-10                   | ≥65, all ages              |
| Azziz-Baumgartner, 2013 (6) | Argentina                                                                                                                           | 2002-2009    | Serfling                                        | Seasonal and 2009 pandemic                                                 | N                                      | P&I, R&C                    | ICD-10                   | All ages                   |
| Bonmarin, 2015 (7)          | France                                                                                                                              | 2000-2009    | RD                                              | Seasonal                                                                   | N                                      | AC                          | -                        | ≥65                        |
| Brinkhof, 2006 (8)          | Switzerland                                                                                                                         | 1969-1999    | GLM                                             | Seasonal and 1968 pandemic                                                 | Influenza mortality rate               | AC                          | ICD-8, ICD-10            | ≥60                        |
| Carrat, 1995 (9)            | France                                                                                                                              | 1980-1990    | GLM                                             | Seasonal                                                                   | Influenza mortality rate               | AC                          | ICD-9                    | Others                     |
| Charu, 2011 (10)            | Mexico                                                                                                                              | 2000-2010    | Serfling                                        | Seasonal and 2009 pandemic                                                 | N                                      | P&I, Res, R&C, AC           | ICD-10                   | 5-19, 20-59, ≥60, all ages |
| Charu, 2013 (11)            | US                                                                                                                                  | 2003-2009    | GLM                                             | Seasonal and 2009 pandemic                                                 | LAB %                                  | P&I, Res, R&C               | -                        | All ages                   |
| Cheng, 2015 (12)            | Argentina, Chile, Mexico, Paraguay, Uruguay, US                                                                                     | 2002-2009    | Serfling, GLM                                   | Seasonal                                                                   | LAB %                                  | Res, R&C                    | ICD-10                   | All ages                   |
| Choi, 1982 (13)             | US                                                                                                                                  | 1968-1979    | ARIMA, Serfling, GLM                            | Seasonal and 1968 pandemic                                                 | The number of acute respiratory deaths | P&I, AC                     | ICD-8                    | All ages                   |
| Chow, 2006 (14)             | Singapore                                                                                                                           | 1996-2003    | GLM                                             | Seasonal                                                                   | LAB %                                  | P&I, R&C, AC                | ICD-9                    | 20-64, ≥65, all ages       |
| Chowell, 2014 (15)          | Spain                                                                                                                               | 1918-1919    | Serfling                                        | 1918 pandemic                                                              | N                                      | Res, AC                     | -                        | All ages                   |
| Cohen, 2010 (16)            | South Africa, US                                                                                                                    | 1998-2005    | Serfling                                        | Seasonal                                                                   | N                                      | P&I, Res, AC                | ICD-9, ICD-10            | ≥65                        |

|                      |                                                                                  |                       |            |                            |                                          |                   |               |                              |
|----------------------|----------------------------------------------------------------------------------|-----------------------|------------|----------------------------|------------------------------------------|-------------------|---------------|------------------------------|
| Collins, 1953 (17)   | US*                                                                              | 1918-1951             | MA         | Seasonal and 1918 pandemic | N                                        | P&I, AC           | -             | All ages                     |
| Cooper, 2015 (18)    | Thailand                                                                         | 2005-2009             | GLM        | Seasonal                   | LAB % × ILI %                            | Res, AC           | ICD-10        | 0-18, 18-59, ≥60, all ages   |
| Dawood, 2012 (19)    | Africa, Americas, Eastern Mediterranean, Europe, Southeast Asia, Western Pacific | 2009-2010             | Multiplier | 2009 pandemic              | N                                        | Res, R&C          | -             | All ages                     |
| Dushoff, 2006 (20)   | US                                                                               | 1979-2001             | GLM        | Seasonal                   | LAB %                                    | P&I, R&C, AC      | ICD-9, ICD-10 | All ages                     |
| Egger, 1989 (21)     | Switzerland                                                                      | 1970-1985             | ARIMA      | Seasonal                   | NA                                       | AC                | -             | All ages                     |
| Fleming, 2000 (22)   | England and Wales                                                                | 1989-1999             | RD         | Seasonal                   | N                                        | AC                | -             | All ages                     |
| Fleming, 2005 (23)   | England                                                                          | 1989-2000             | RD         | Seasonal                   | N                                        | Res, AC           | ICD-9         | 0-14, all ages               |
| Foppa, 2008 (24)     | US                                                                               | 1995-2005             | GLM        | Seasonal                   | The number of influenza-certified deaths | AC                | ICD-9, ICD-10 | All ages                     |
| Foppa, 2015 (25)     | US                                                                               | 2005-2014             | GLM        | Seasonal and 2009 pandemic | Others                                   | R&C               | ICD-10        | 0.5-19, 20-64, ≥65, all ages |
| Goldstein, 2012 (26) | US                                                                               | 1997-2007             | GLM        | Seasonal                   | LAB % × ILI %                            | P&I, Res, AC      | ICD-9, ICD-10 | All ages                     |
| Gran, 2010 (27)      | Norway                                                                           | 1975-2004             | GLM        | Seasonal                   | ILI number                               | AC                | -             | 0-14, 15-64, ≥65, all ages   |
| Gran, 2013 (28)      | Norway                                                                           | 1998-2011             | GLM        | Seasonal and 2009 pandemic | ILI number                               | P&I, AC           | ICD-10        | 0-14, 15-64, ≥65, all ages   |
| Green, 2013 (29)     | England and Wales                                                                | 2006-2012             | GLM        | Seasonal and 2009 pandemic | LAB % × ILI %                            | P&I, Res, R&C, AC | ICD-10        | 0-14, 15-64, ≥65             |
| Hardelid, 2013 (30)  | England and Wales                                                                | 1999-2010             | GLM        | Seasonal and 2009 pandemic | LAB number                               | AC                | -             | 0-14, all ages               |
| Housworth, 1974 (31) | US                                                                               | 1957-1966             | Serfling   | Seasonal and 1957 pandemic | N                                        | Res, AC           | -             | All ages                     |
| Imaz 2006 (32)       | Argentina                                                                        | 1992-2002             | ARIMA      | Seasonal                   | NA                                       | P&I, AC           | -             | ≥65, all ages                |
| Ivan 1969 (33)       | Moldova                                                                          | 1957-1967             | GLM        | Seasonal and 1957 pandemic | Unclear                                  | AC                | -             | All ages                     |
| Jansen, 2007 (34)    | Netherlands                                                                      | 1997-2003             | RD         | Seasonal                   | N                                        | AC                | ICD-9         | ≥65                          |
| Kessaram, 2015 (35)  | New Zealand                                                                      | 1990-2008             | GLM        | Seasonal                   | LAB number                               | R&C, AC           | ICD-9, ICD-10 | ≥65, all ages                |
| Kuo, 2011 (36)       | Austria                                                                          | 2001-2009             | Serfling   | Seasonal                   | N                                        | AC                | -             | All ages                     |
| Kyncl, 2005 (37)     | Czech Republic                                                                   | 1982-2000             | Surv       | Seasonal                   | N                                        | AC                | ICD-9         | All ages                     |
| Lee, 2007 (38)       | Singapore                                                                        | 1918, 1957, 1968-1970 | Regression | 1918, 1957, 1968 pandemic  | N                                        | AC                | -             | All ages                     |
| Lee, 2009 (39)       | Singapore                                                                        | 1972-2000             | MA         | Seasonal                   | N                                        | AC                | -             | All ages                     |

|                           |                                                                                                                                                                                                                                                        |                                            |               |                                        |            |                   |                             |                            |
|---------------------------|--------------------------------------------------------------------------------------------------------------------------------------------------------------------------------------------------------------------------------------------------------|--------------------------------------------|---------------|----------------------------------------|------------|-------------------|-----------------------------|----------------------------|
| Lemaitre, 2012 (40)       | France                                                                                                                                                                                                                                                 | 1997-2010                                  | GLM           | Seasonal and 2009 pandemic             | ILI %      | P&I, Res, R&C, AC | ICD8, ICD-9, ICD-10         | ≥65, all ages              |
| Leon-Gomez, 2015 (41)     | Spain*                                                                                                                                                                                                                                                 | 2006-2012                                  | Serfling      | Seasonal and 2009 pandemic             | N          | P&I, Res, AC      | ICD-10                      | ≥65, all ages              |
| Li, 2006 (42)             | Hong Kong                                                                                                                                                                                                                                              | 1999-2000                                  | GLM           | Seasonal                               | LAB %      | P&I, R&C          | ICD-9                       | All ages                   |
| Linhart, 2011 (43)        | Israel                                                                                                                                                                                                                                                 | 1999-2005                                  | MA            | Seasonal                               | N          | P&I, R&C, AC      | ICD-10                      | ≥65, all ages              |
| Lopez-Cuadrado, 2012 (44) | Spain                                                                                                                                                                                                                                                  | 1999-2005                                  | Serfling, GLM | Seasonal                               | LAB number | P&I, AC           | ICD-10                      | ≥65, all ages              |
| Lui, 1987 (45)            | US                                                                                                                                                                                                                                                     | 1973-1985                                  | Serfling      | Seasonal                               | N          | P&I, AC           | ICD-8, ICD-9                | All ages                   |
| Mamelund, 2000 (46)       | Norway                                                                                                                                                                                                                                                 | 1918-1919, 1957-1958, 1969-1970, 1977-1978 | RD            | Seasonal and 1918, 1957, 1968 pandemic | N          | AC                | -                           | All ages                   |
| Mann, 2013 (47)           | England and Wales                                                                                                                                                                                                                                      | 1975-2005                                  | GLM           | Seasonal                               | Others     | P&I               | ICD-8, ICD-9, ICD-10        | ≥65                        |
| Matias, 2014 (48)         | US                                                                                                                                                                                                                                                     | 1997-2009                                  | GLM           | Seasonal                               | LAB %      | P&I, Res, R&C     | ICD-9, ICD-10               | 0-17, 18-64, ≥65, all ages |
| Mazick, 2010 (49)         | Europe*                                                                                                                                                                                                                                                | 2009                                       | Serfling      | 2009 pandemic                          | N          | AC                | -                           | 5-14                       |
| Molbak, 2011 (50)         | Denmark                                                                                                                                                                                                                                                | 2009                                       | GLM           | 2009 pandemic                          | ILI %      | AC                | -                           | 0-14, 15-64, ≥65, all ages |
| Murray, 2006 (51)         | Argentina, Venezuela, Australia, Austria, Belgium, Canada, Chile, Denmark, England, Finland, France, Germany, India, Italy, Japan, Netherlands, New Zealand, Norway, Philippines, Portugal, Spain, Sri Lanka, Sweden, Switzerland, Taiwan, Uruguay, US | 1918-1920                                  | RD            | 1918 pandemic                          | N          | AC                | -                           | All ages                   |
| Muscattello, 2014 (52)    | Australia                                                                                                                                                                                                                                              | 2003-2009                                  | GLM           | Seasonal and 2009 pandemic             | LAB number | Res, R&C, AC      | ICD-10                      | ≥65, all ages              |
| Newall, 2008 (53)         | Australia                                                                                                                                                                                                                                              | 1997-2004                                  | GLM           | Seasonal                               | LAB number | P&I, AC           | ICD-10                      | ≥65                        |
| Newall, 2010 (54)         | Australia                                                                                                                                                                                                                                              | 1997-2004                                  | GLM, Serfling | Seasonal                               | LAB number | Res, AC           | ICD-10                      | ≥65                        |
| Nguyen, 2013 (55)         | US                                                                                                                                                                                                                                                     | 2009-2010                                  | Serfling      | Seasonal and 2009 pandemic             | N          | P&I               | ICD-7, ICD-8, ICD-9, ICD-10 | 0-14, 15-64, ≥65, all ages |
| Nicholson, 1996 (56)      | England and Wales                                                                                                                                                                                                                                      | 1975-1990                                  | TwoR          | Seasonal                               | Unclear    | AC                | -                           | All ages                   |
| Nielsen, 2011 (57)        | Denmark                                                                                                                                                                                                                                                | 1994-2010                                  | GLM           | Seasonal and 2009 pandemic             | Others     | AC                | -                           | 0-14, 15-64, ≥65, all ages |

|                         |                                                                                                             |           |              |                            |                                          |              |               |                            |
|-------------------------|-------------------------------------------------------------------------------------------------------------|-----------|--------------|----------------------------|------------------------------------------|--------------|---------------|----------------------------|
| Nogueira, 2009 (58)     | Portugal                                                                                                    | 2008-2009 | Serfling     | Seasonal                   | N                                        | AC           | -             | ≥65, all ages              |
| Nunes, 2011 (59)        | Portugal                                                                                                    | 1980-2004 | ARIMA        | Seasonal                   | N                                        | P&I, Res, AC | ICD-9, ICD-10 | Others                     |
| Ohmi, 2011 (60)         | Japan                                                                                                       | 1952-2006 | RMD          | Seasonal                   | N                                        | AC           | -             | All ages                   |
| Park, 2016 (61)         | South Korea                                                                                                 | 2003-2013 | GLM          | Seasonal and 2009 pandemic | LAB % × ILI %                            | P&I, Res, AC | ICD-10        | 0-14, 15-64, ≥65, all ages |
| Pitman, 2007 (62)       | England and Wales                                                                                           | 1996-2004 | GLM          | Seasonal                   | LAB number                               | Res          | ICD-9, ICD-10 | 0-14, 15-64, ≥65, all ages |
| Presanis, 2011 (63)     | England                                                                                                     | 2009-2010 | Multiplier   | 2009 pandemic              | N                                        | AC           | -             | All ages                   |
| Quandelacy, 2014 (64)   | US                                                                                                          | 1997-2007 | GLM          | Seasonal                   | LAB % × ILI %                            | P&I, Res, AC | ICD-9, ICD-10 | 0-17, 15-64, ≥65, all ages |
| Reed, 2015 (65)         | US                                                                                                          | 2010-2013 | Multiplier   | Seasonal                   | N                                        | AC           | -             | 0-18, 19-64, ≥65, all ages |
| Richard, 2009 (66)      | Japan, UK, US                                                                                               | 1918-1920 | Serfling, RD | 1918 pandemic              | N                                        | P&I, AC      | -             | All ages                   |
| Rizzo, 2006 (67)        | Italy                                                                                                       | 1970-2001 | Serfling     | Seasonal                   | N                                        | P&I, AC      | ICD-8, ICD-9  | ≥65                        |
| Rizzo, 2007 (68)        | Italy <sup>d</sup>                                                                                          | 1970-2001 | Serfling     | Seasonal                   | N                                        | P&I, AC      | ICD-8, ICD-9  | Others                     |
| Schanzer, 2007 (69)     | Canada                                                                                                      | 1990-1999 | GLM          | Seasonal                   | The number of influenza-certified deaths | P&I, AC      | ICD-9         | ≥65, all ages              |
| Schanzer, 2013 (70)     | Canada                                                                                                      | 1992-2009 | GLM          | Seasonal                   | Others                                   | AC           | ICD-9, ICD-10 | All ages                   |
| Serfling, 1967 (71)     | US                                                                                                          | 1957-1958 | Serfling     | 1957 pandemic              | N                                        | P&I          | -             | 5-14, all ages             |
| Shrestha, 2011 (72)     | US                                                                                                          | 2009-2010 | Multiplier   | 2009 pandemic              | N                                        | AC           | -             | 0-17, 18-64, ≥65, all ages |
| Simonsen, 1997 (73)     | US                                                                                                          | 1972-1992 | Serfling     | Seasonal                   | N                                        | P&I, AC      | ICD-8, ICD-9  | All ages                   |
| Simonsen, 1998 (74)     | US                                                                                                          | 1968-1995 | MA, Serfling | Seasonal and 1968 pandemic | N                                        | P&I          | ICD-8, ICD-9  | All ages                   |
| Simonsen, 2005 (75)     | US                                                                                                          | 1968-2001 | Serfling     | Seasonal and 1968 pandemic | N                                        | AC           | ICD-9, ICD-10 | ≥65, all ages              |
| Simonsen, 2013 (76)     | Africa, Eastern Mediterranean, Europe, Americas, Southeast Asia, Western Pacific, Mexico, US, China, France | 2009      | GLM          | 2009 pandemic              | LAB number                               | Res, R&C, AC | ICD-10        | ≥65                        |
| Simon Mendez, 2012 (77) | Spain                                                                                                       | 1980-2008 | Serfling     | Seasonal                   | N                                        | P&I          | ICD-9, ICD-10 | ≥65, all ages              |
| Sprenger, 1993 (78)     | Netherlands                                                                                                 | 1967-1989 | GLM          | Seasonal and 1968 pandemic | Influenza mortality rate                 | AC           | ICD-9         | ≥60, all ages              |
| Stroup, 1988 (79)       | US                                                                                                          | 1968-1983 | ARIMA, TF    | Seasonal and 1968 pandemic | N                                        | P&I, AC      | -             | 0-14, 15-64, ≥65, all ages |

|                          |                                                         |                 |                          |                            |                                                          |               |                                    |                            |
|--------------------------|---------------------------------------------------------|-----------------|--------------------------|----------------------------|----------------------------------------------------------|---------------|------------------------------------|----------------------------|
| Tachibana, 1999 (80)     | Japan                                                   | 1980-1994       | RMD                      | Seasonal                   | N                                                        | AC            | ICD-9                              | 0-14, 15-64, ≥65, all ages |
| Takahashi, 2001 (81)     | Japan                                                   | 1975-1997       | RMD                      | Seasonal                   | N                                                        | AC            | ICD-8, ICD-9                       | All ages                   |
| Takahashi, 2002 (82)     | Japan                                                   | 1975-1999       | RMD                      | Seasonal                   | N                                                        | AC            | ICD-8, ICD-9, ICD-10               | ≥65, all ages              |
| Takahashi, 2008 (83)     | Japan                                                   | 1987-2005       | RMD                      | Seasonal                   | N                                                        | AC            | ICD-9, ICD-10                      | ≥65, all ages              |
| Tempia, 2014 (84)        | South Africa                                            | 1998-2009       | GLM                      | Seasonal and 2009 pandemic | LAB %                                                    | P&I, Res      | ICD-10                             | Others                     |
| Tempia, 2015 (85)        | South Africa                                            | 1998-2009       | GLM                      | Seasonal and 2009 pandemic | LAB %                                                    | P&I, Res, AC  | ICD-10                             | 5-19, 20-64, ≥65           |
| Thompson, 2003 (86)      | US                                                      | 1976-1999       | GLM                      | Seasonal                   | LAB %                                                    | P&I, AC       | ICD-9, ICD-10                      | All ages                   |
| Thompson, 2009 (87)      | US                                                      | 1976-2003       | RD, Serfling, GLM, ARIMA | Seasonal                   | LAB %                                                    | R&C           | ICD-8, ICD-9, ICD-10               | ≥65, all ages              |
| Tillett, 1980 (88)       | England and Wales                                       | 1975-1979       | GLM                      | Seasonal                   | Others                                                   | AC            | -                                  | All ages                   |
| Tillett, 1983 (89)       | England and Wales                                       | 1968-1978       | GLM                      | Seasonal and 1968 pandemic | Others                                                   | Res           | ICD-8                              | All ages                   |
| US CDC, 2010 (90)        | US                                                      | 1976-2007       | GLM                      | Seasonal                   | LAB %                                                    | P&I, R&C      | ICD-8, ICD-9, ICD-10               | 0-19, 20-64, ≥65, all ages |
| van Asten, 2012 (91)     | Netherlands                                             | 1999-2007       | GLM                      | Seasonal                   | LAB number                                               | AC            | -                                  | ≥65                        |
| Wijngaard, 2012 (92, 93) | Netherlands                                             | 1999-2010       | GLM                      | Seasonal and 2009 pandemic | ILI %                                                    | P&I, R&C, AC  | ICD-10                             | ≥65, all ages              |
| Viboud, 2005 (94)        | US, Canada, England and Wales, France, Japan, Australia | 1967-1970       | Serfling                 | Seasonal and 1968 pandemic | N                                                        | P&I, AC       | -                                  | All ages                   |
| Viboud, 2006 (67)        | Canada, England and Wales                               | 1951, 1957-1958 | Serfling                 | Seasonal and 1957 pandemic | N                                                        | P&I, AC       | ICD-6, ICD-7, ICD-8, ICD-9, ICD-10 | All ages                   |
| Viboud, 2016 (95)        | World                                                   | 1957-1959       | Regression               | 1957 pandemic              | N                                                        | P&I, Res, R&C | ICD-7                              | ≥65, all ages              |
| Wong, 2004 (96)          | Hong Kong                                               | 1996-1999       | RD, GLM                  | Seasonal                   | LAB %                                                    | P&I, R&C, AC  | ICD-9                              | ≥65, all ages              |
| Wong, 2012 (97)          | Hong Kong, Singapore                                    | 2006-2008       | GLM                      | Seasonal                   | LAB %                                                    | P&I, R&C, AC  | -                                  | ≥65, all ages              |
| Wong, 2013 (98)          | Hong Kong                                               | 2009            | DLM, GLM                 | 2009 pandemic              | Incidence rate of influenza, LAB % × ILI %, ILI %, LAB % | AC            | ICD-10                             | 0-14, 15-59, ≥60, all ages |
| Wu, 2012 (99)            | Hong Kong                                               | 1998-2009       | GLM                      | Seasonal and 2009 pandemic | LAB % × ILI %                                            | P&I, Res, AC  | ICD-9, ICD-10                      | 0-14, 15-64, ≥65, all ages |
| Wu, 2014 (100)           | Hong Kong                                               | 2009-2011       | GLM                      | Seasonal and 2009 pandemic | LAB % × ILI %                                            | Res, AC       | ICD-9, ICD-10                      | ≥65                        |
| Yang, 2011 (101)         | Hong Kong, Singapore                                    | 2004-2006       | GLM                      | Seasonal                   | LAB %                                                    | P&I, R&C, AC  | ICD-10, ICD-9                      | ≥65, all ages              |

|                  |           |           |               |                            |       |              |        |                            |
|------------------|-----------|-----------|---------------|----------------------------|-------|--------------|--------|----------------------------|
| Yang, 2012 (102) | Hong Kong | 1998-2009 | GLM           | Seasonal and 2009 pandemic | LAB % | P&I, R&C, AC | ICD-10 | 0-19, 20-64, ≥65, all ages |
| Yu, 2013 (103)   | China*    | 2004-2010 | GLM           | Seasonal and 2009 pandemic | LAB % | Res, R&CAC   | ICD-10 | ≥65, all ages              |
| Zucs, 2005 (104) | Germany   | 1985-2001 | Serfling, RMD | Seasonal                   | N     | AC           | -      | All ages                   |

US\* represents 35 large US cities for the periods of 1918-1934 and 56 large US cities for the periods of 1935-1951. Spain\* means 52 provincial capitals in Spain. Europe\* is 8 European Countries including Belgium, Denmark, Greece, Hesse (region of Germany), Malta, the Netherlands, Sweden and Switzerland. Italy\* means Northern, Central and Southern Italy. China\* represents 128 sites in China. #: Lab % refers to the proportion of laboratory samples testing positive for influenza. Lab number represents the number of laboratory samples testing positive for influenza. ILI % is the proportion of ambulatory consultations for influenza-like illness. ILI number refers to the number of ambulatory consultations for influenza-like illness. Others (influenza activity proxy) include Lab % × normalized number of outpatient visits due to ILI, number of laboratory-confirmed influenza A infections, a variation of ILI % (i.e. a product of ILI % of a specific influenza season and a normal distribution whose mean and standard derivation are the same as the ILI % over the same influenza season), mixed proxies used for different types of influenza viruses (i.e. influenza A: a combination of laboratory positive tests and the number of hospital admissions with laboratory-confirmation of influenza; influenza B: Lab %), and rate of clinical 'epidemic influenza'. N means no influenza activity proxy used in the model. Others (age group) include <1, 1-4, <5, ≥75 years, and standardized rates for 0-14, 15-44, 45-64, ≥65 years.

§: GLM, generalized linear model; RD, incidence rate-difference model; Serfling, Serfling-type model; ARIMA, autoregressive integrated moving average model; MA, moving average method; Multiplier, multiplier method; Surv, survival analysis; Regression, regression model without influenza activity proxy; TwoR, primary and secondary regression models to estimate the influenza-associated mortality with the predicted outcome of the primary regression as the dependent variable of the secondary regression; TF, transfer function; DLM, dynamic linear model; RMD, relative mortality distribution model.

Regression models with an influenza activity include DLM, GLM, and TwoR.

Models without an influenza activity proxy other than multiplier methods and Serfling-type models include Regression, ARIMA, TF, Surv, MA, RD, and RMD.

¶: P&I, pneumonia and influenza; Res, respiratory diseases; R&C, respiratory and cardiovascular diseases; AC, all causes.

Δ: ICD, the International Classification of Diseases.



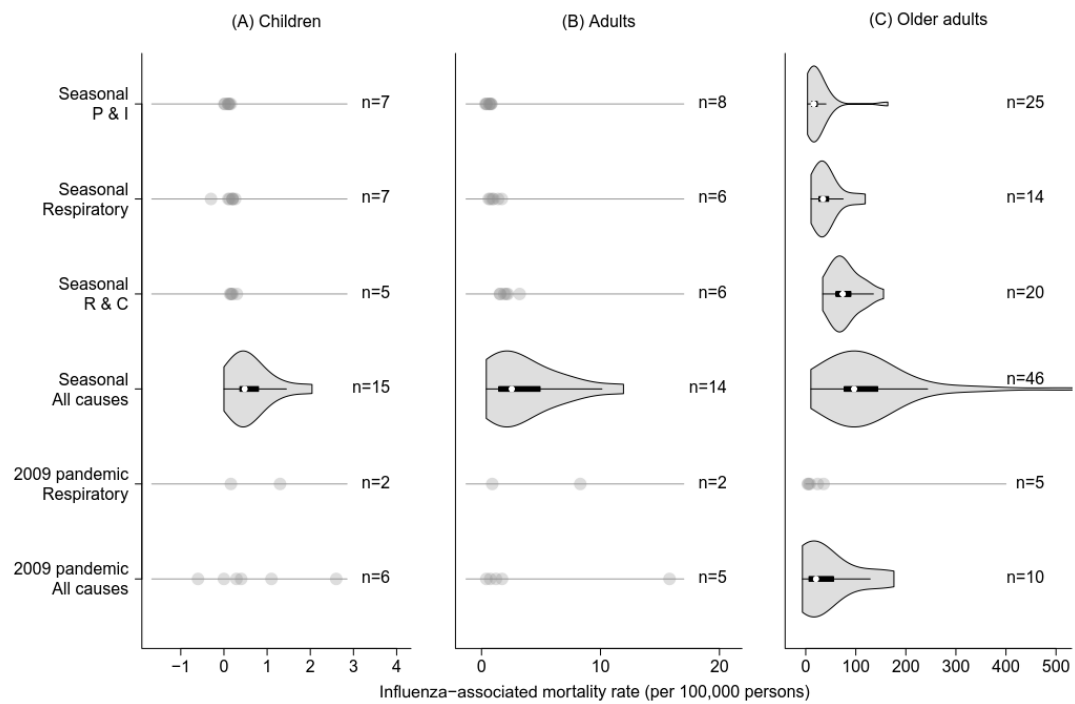

**Web Figure 1.** Estimates of the annual influenza-associated mortality rate by age group and cause of death. Abbreviations: P&I, pneumonia and influenza; R&C, respiratory and cardiovascular diseases. If the number of estimates was  $\geq 10$ , we used violin plots to show the estimates. If the number of estimates was  $< 10$ , the estimate from each study was indicated with dots. n indicates the number of studies for each category. The white point represents the median, the black box represents the interquartile range and the black line represents the range of all the estimates included in that outcome-population category; e.g. 46 estimates of the influenza-associated all-cause mortality burden were extracted for older adults, with a median of 97 per 100,000 persons and an interquartile range between 77 and 144 per 100,000 persons. The width of the violin represents the probability density of the estimates at different values; the wider the violin, the more variable the estimated mortality rates.

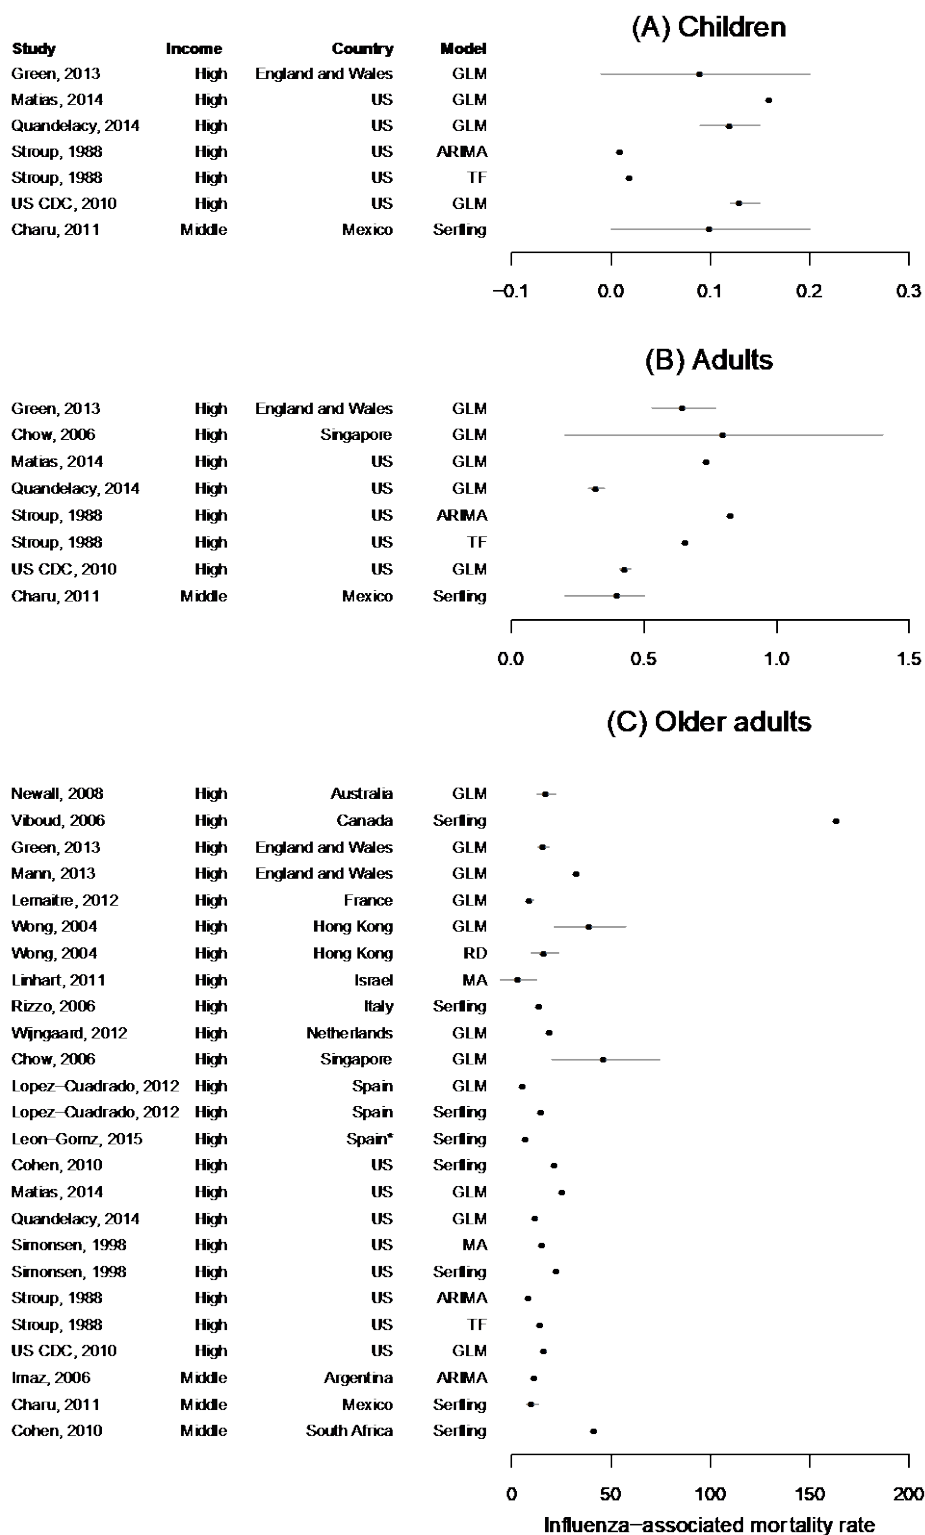

**Web Figure 2.** Annual age-specific influenza-associated excess pneumonia and influenza mortality rates in seasonal periods. (A) Estimates for children. (B) Estimates for adults (Cochran's  $Q$  for GLM:  $Q = 71$ ,  $P < 0.001$ ). (C) Estimates

for older adults (Cochran's  $Q$  for GLM:  $Q = 285, P < 0.001$ ; Serfling:  $Q = 1658, P < 0.001$ ; other models:  $Q = 13, P < 0.023$ ). Spain\* means 52 provincial capitals in Spain. GLM, generalized linear model; ARIMA, autoregressive integrated moving average model; TF, transfer function; Serfling, Serfling-type model; MA, moving average method; RD, incidence rate-difference model.

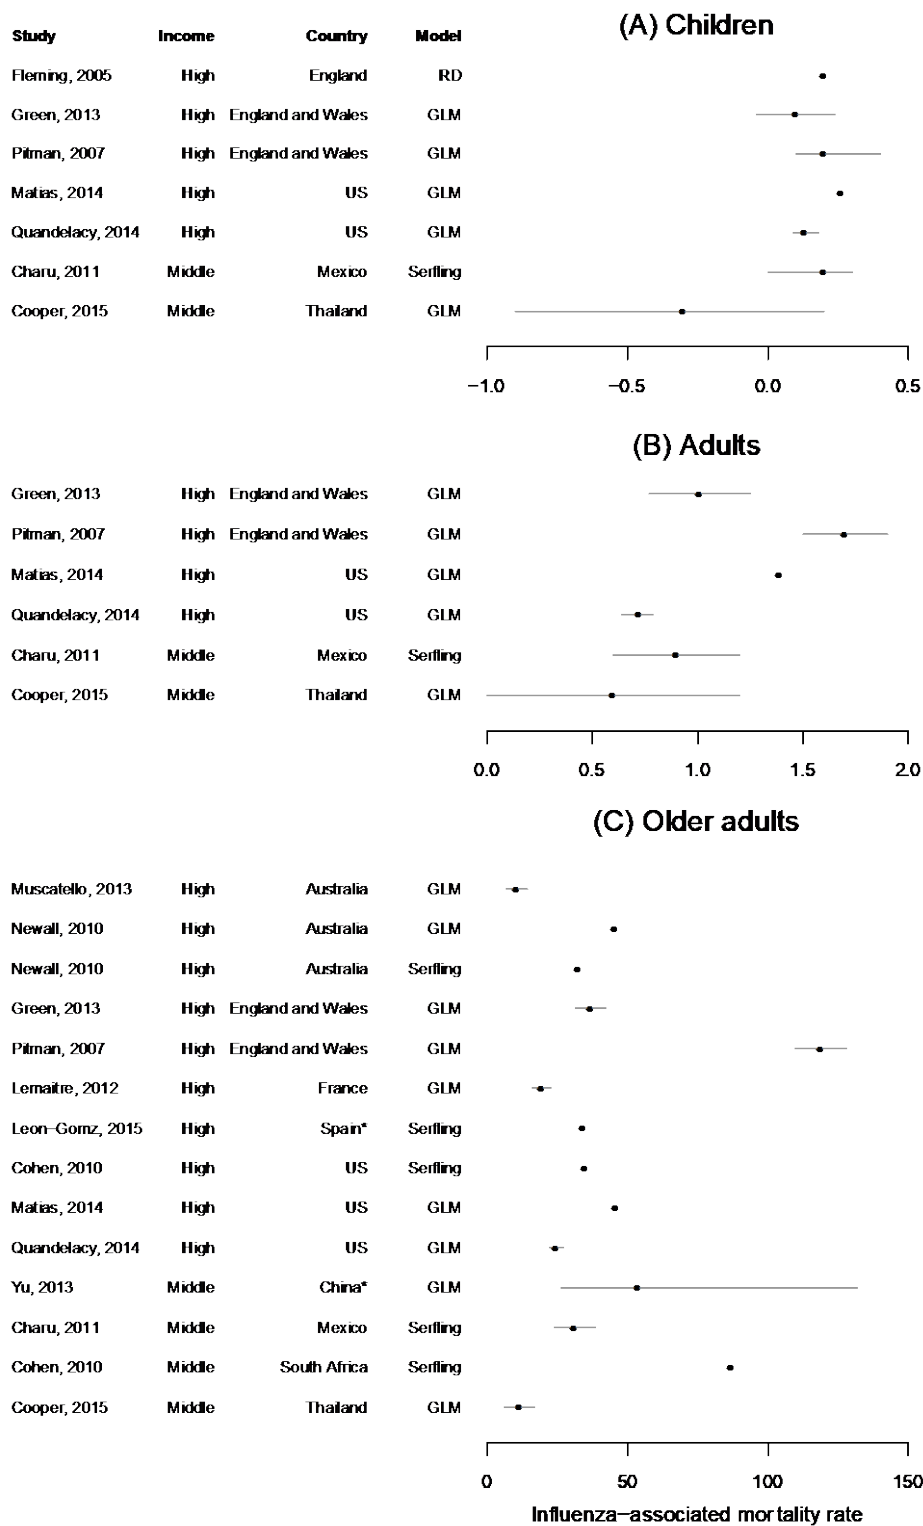

**Web Figure 3.** Annual age-specific influenza-associated excess respiratory mortality rates in seasonal periods. (A) Estimates for children (Cochran’s  $Q$  for GLM:  $Q = 6, P = 0.209$ ). (B) Estimates for adults (Cochran’s  $Q$  for GLM:  $Q = 93, P <$

0.001). (C) Estimates for older adults (Cochran's  $Q$  for GLM:  $Q = 558, P < 0.001$ ; Serfling:  $Q = 85, P < 0.001$ ). Spain\* means 52 provincial capitals in Spain. China\* represents 128 sites in China. RD, incidence rate-difference model. GLM, generalized linear model; Serfling, Serfling-type model.

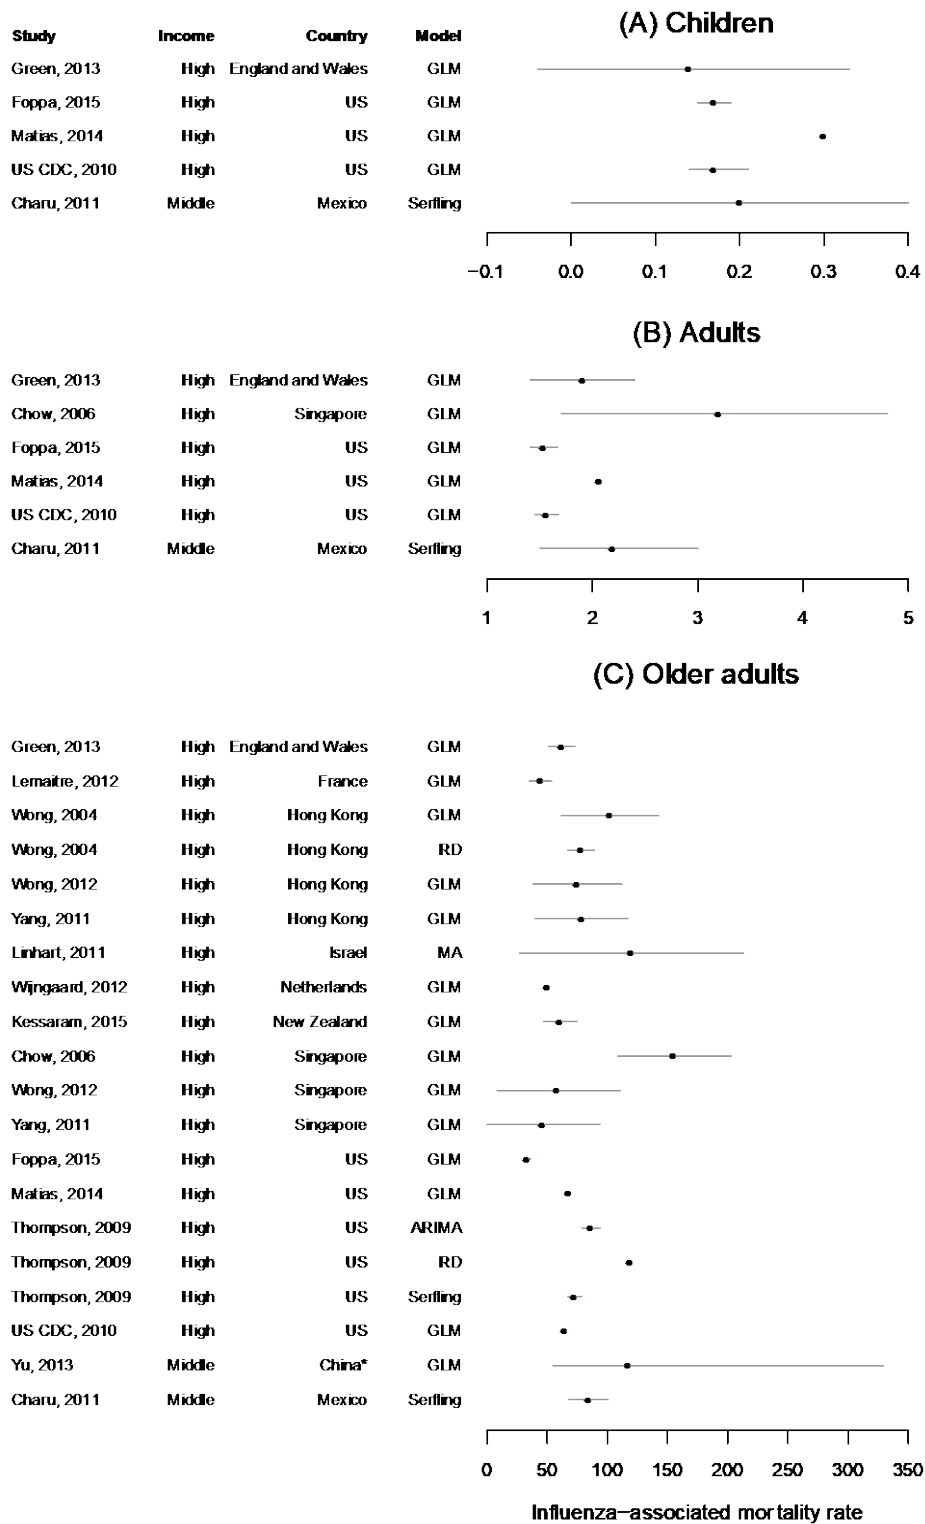

**Web Figure 4.** Annual age-specific influenza-associated excess respiratory and cardiovascular mortality rates in seasonal periods. (A) Estimates for children. (B) Estimates for adults (Cochran’s  $Q$  test for GLM:  $Q = 10$ ,  $P = 0.047$ ).

(C) Estimates for older adults (Cochran's  $Q$  for GLM:  $Q = 517, P < 0.001$ ). China\* represents 128 sites in China. GLM, generalized linear model; Serfling, Serfling-type model; MA, moving average method; RD, incidence rate-difference model; ARIMA, autoregressive integrated moving average model.

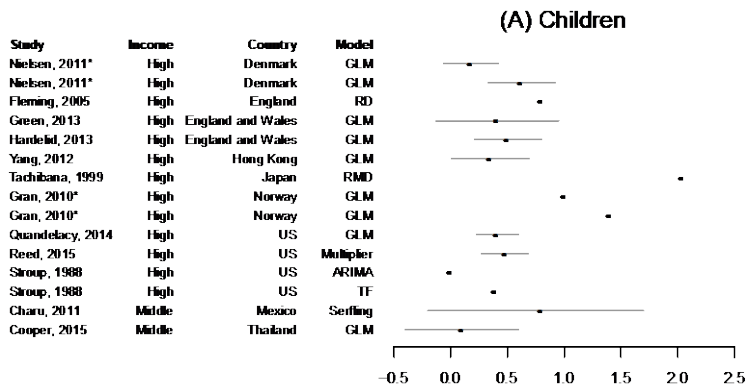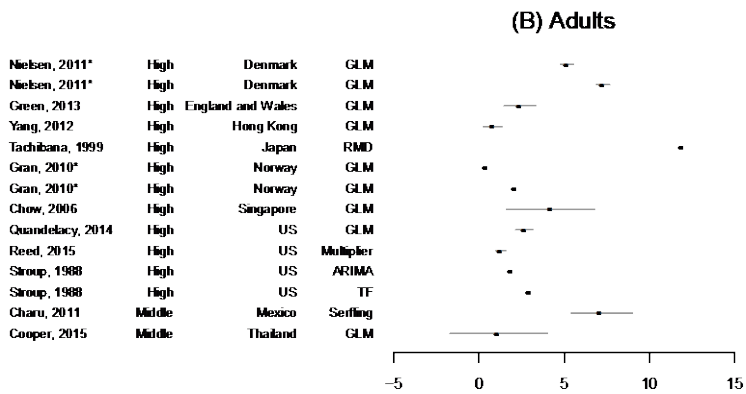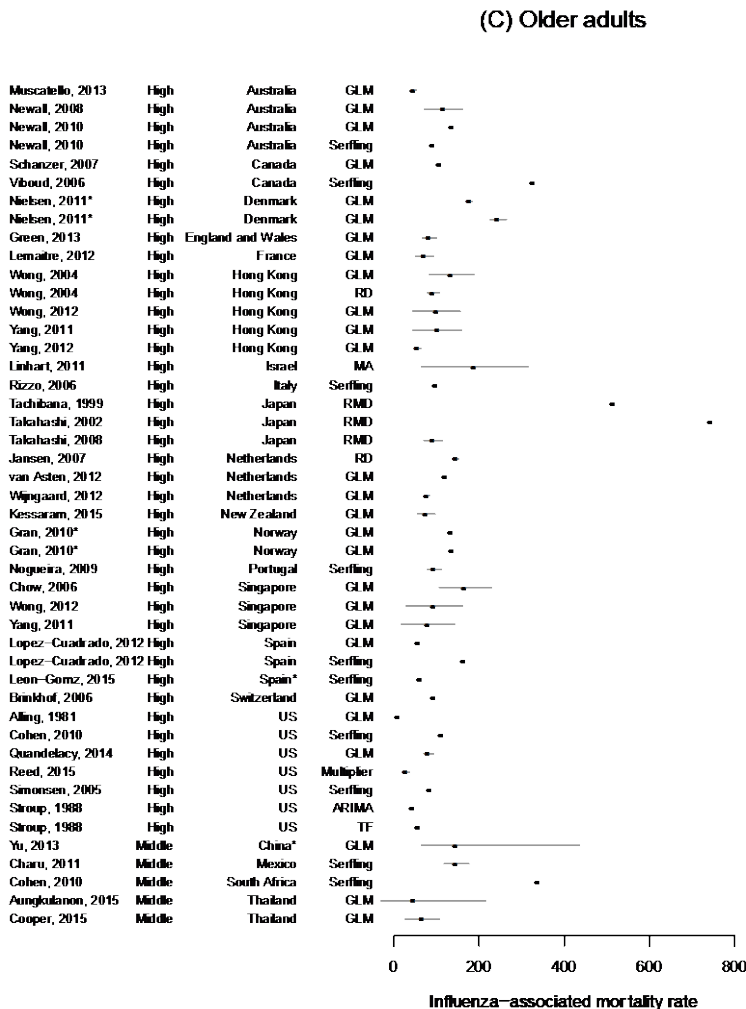



**Web Figure 5.** Annual age-specific influenza-associated excess all-cause mortality rates in seasonal periods. (A) Estimates for children (Cochran's  $Q$  for GLM:  $Q = 29$ ,  $P < 0.001$ ). (B) Estimates for adults (Cochran's  $Q$  for GLM:  $Q = 521$ ,  $P < 0.001$ ). (C) Estimates for older adults (Cochran  $Q$  for GLM:  $Q = 1383$ ,  $P < 0.001$ ; Serfling:  $Q = 64$ ,  $P < 0.001$ ; other models:  $Q = 140$ ,  $P < 0.001$ ). Nielsen, 2011\* means there are two estimates derived from models using two different influenza activity proxies. Gran, 2010\* means there are two estimates for the periods of 1975-1998 and the periods of 1998-2004, respectively. Spain\* means 52 provincial capitals in Spain. China\* represents 128 sites in China. RD, incidence rate-difference model; GLM, generalized linear model; Multiplier, multiplier method; ARIMA, autoregressive integrated moving average model; TF, transfer function; RMD, relative mortality distribution model; Serfling, Serfling-type model; MA, moving average method.

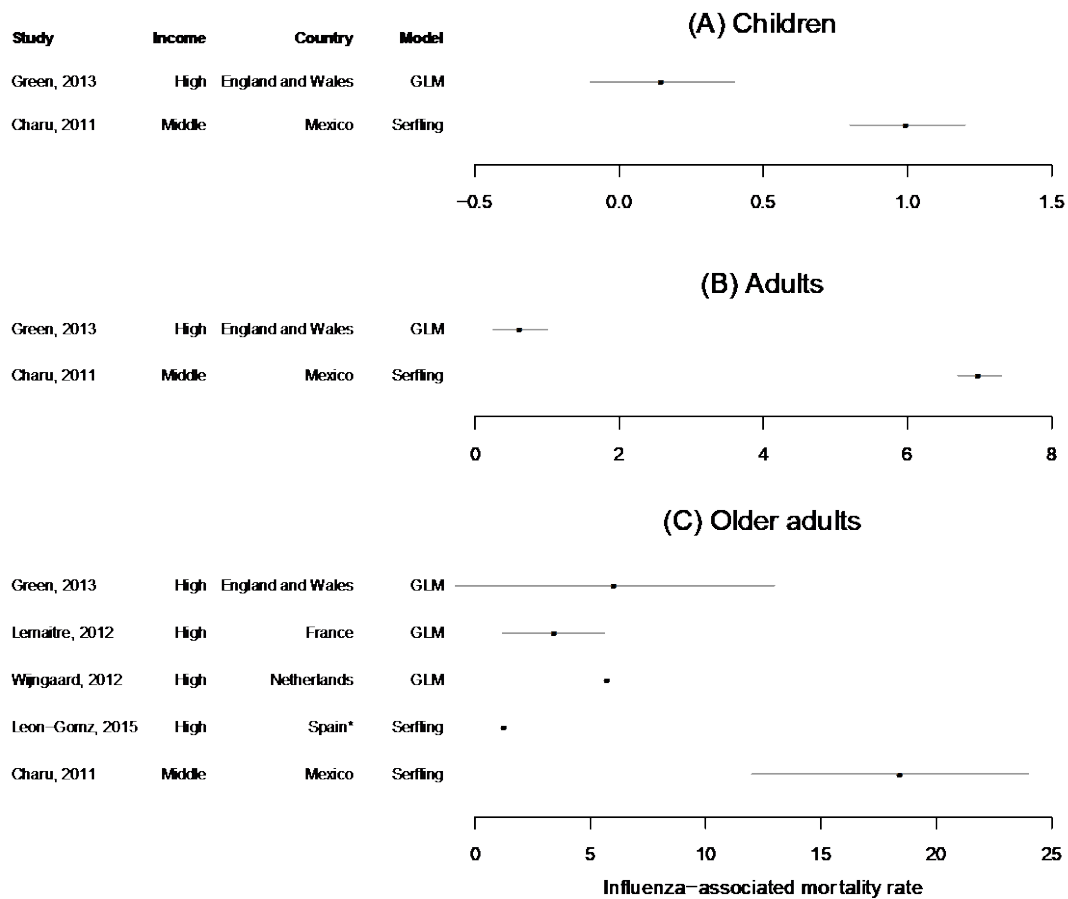

**Web Figure 6.** Annual age-specific influenza-associated excess pneumonia and influenza mortality rates in the 2009 pandemic periods. (A) Estimates for children. (B) Estimates for adults. (C) Estimates for older adults. Spain\* means 52 provincial capitals in Spain. Serfling, Serfling-type model; GLM, generalized linear model.

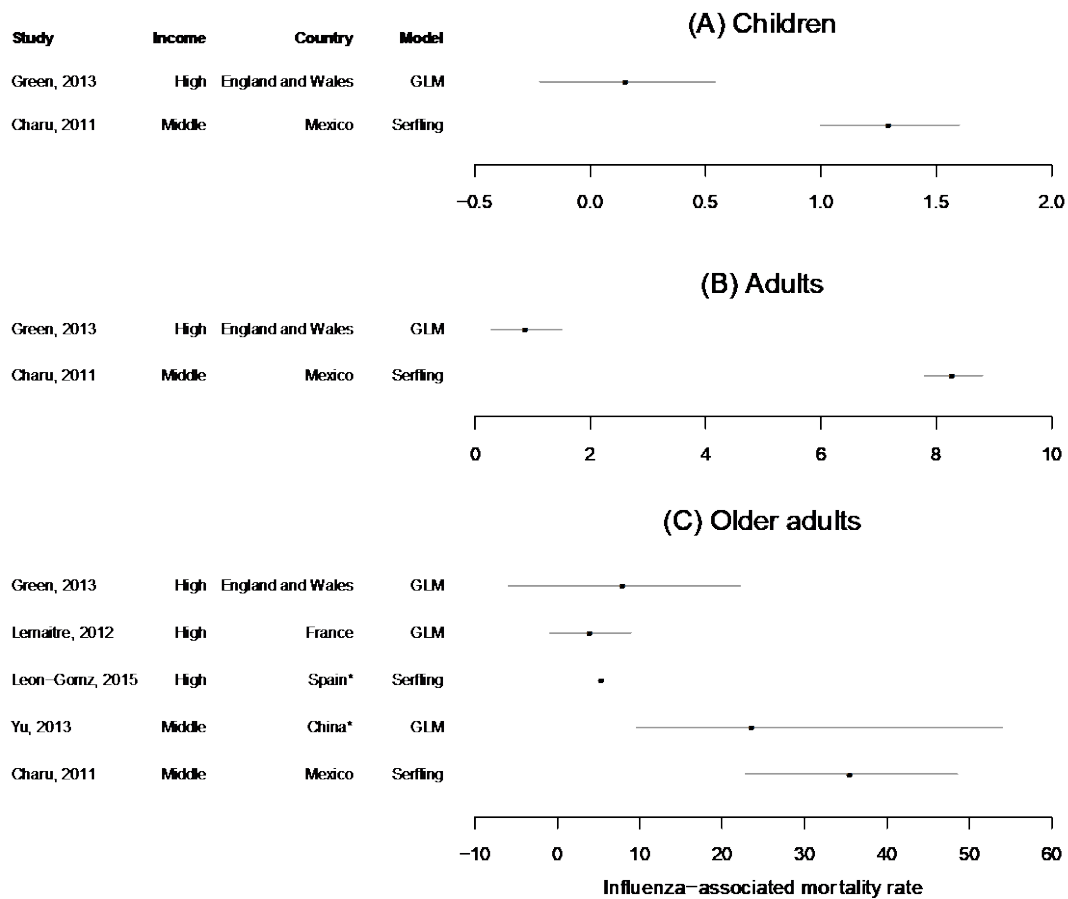

**Web Figure 7.** Annual age-specific influenza-associated excess respiratory mortality rates in the 2009 pandemic periods. (A) Estimates for children. (B) Estimates for adults. (C) Estimates for older adults. Spain\* means 52 provincial capitals in Spain. China\* represents 128 sites in China. Serfling, Serfling-type model; GLM, generalized linear model.

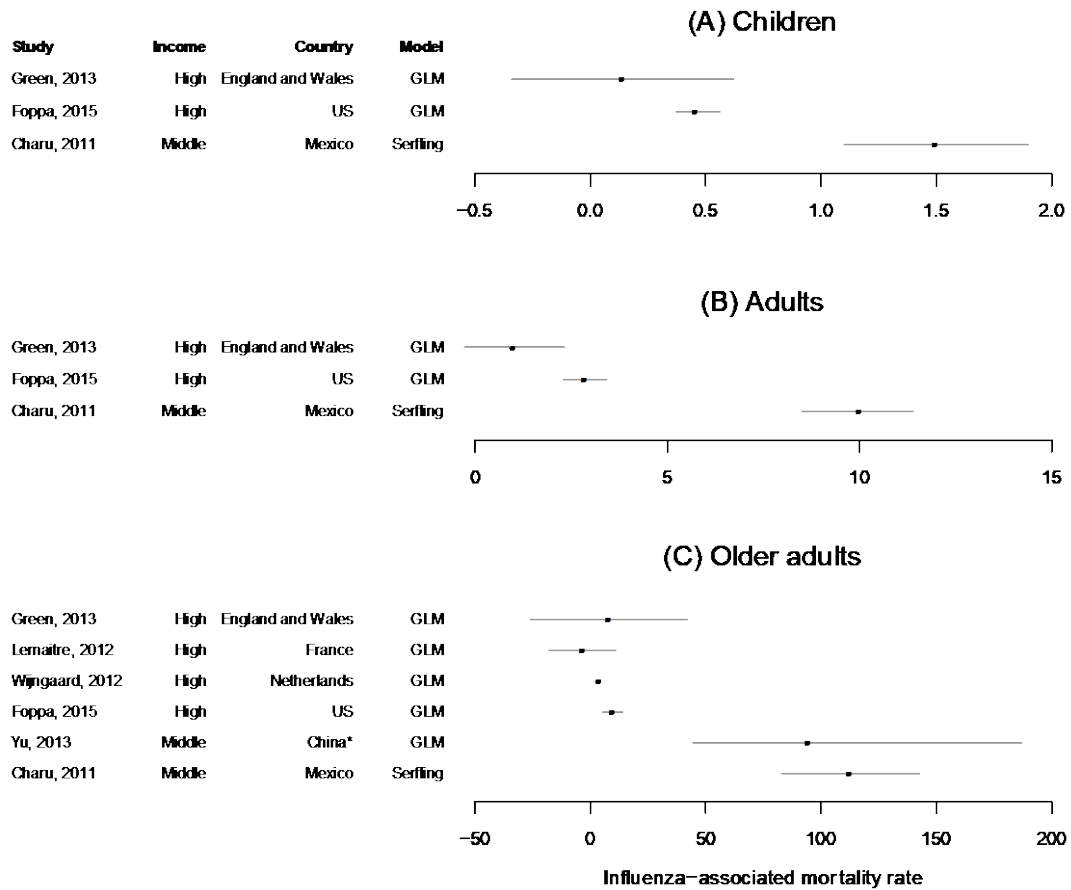

**Web Figure 8.** Annual age-specific influenza-associated excess respiratory and cardiovascular mortality rates in the 2009 pandemic periods. (A) Estimates for children. (B) Estimates for adults. (C) Estimates for older adults (Cochran's  $Q$  for GLM:  $Q = 9, P = 0.061$ ). China\* represents 128 sites in China. Serfling, Serfling-type model; GLM, generalized linear model.

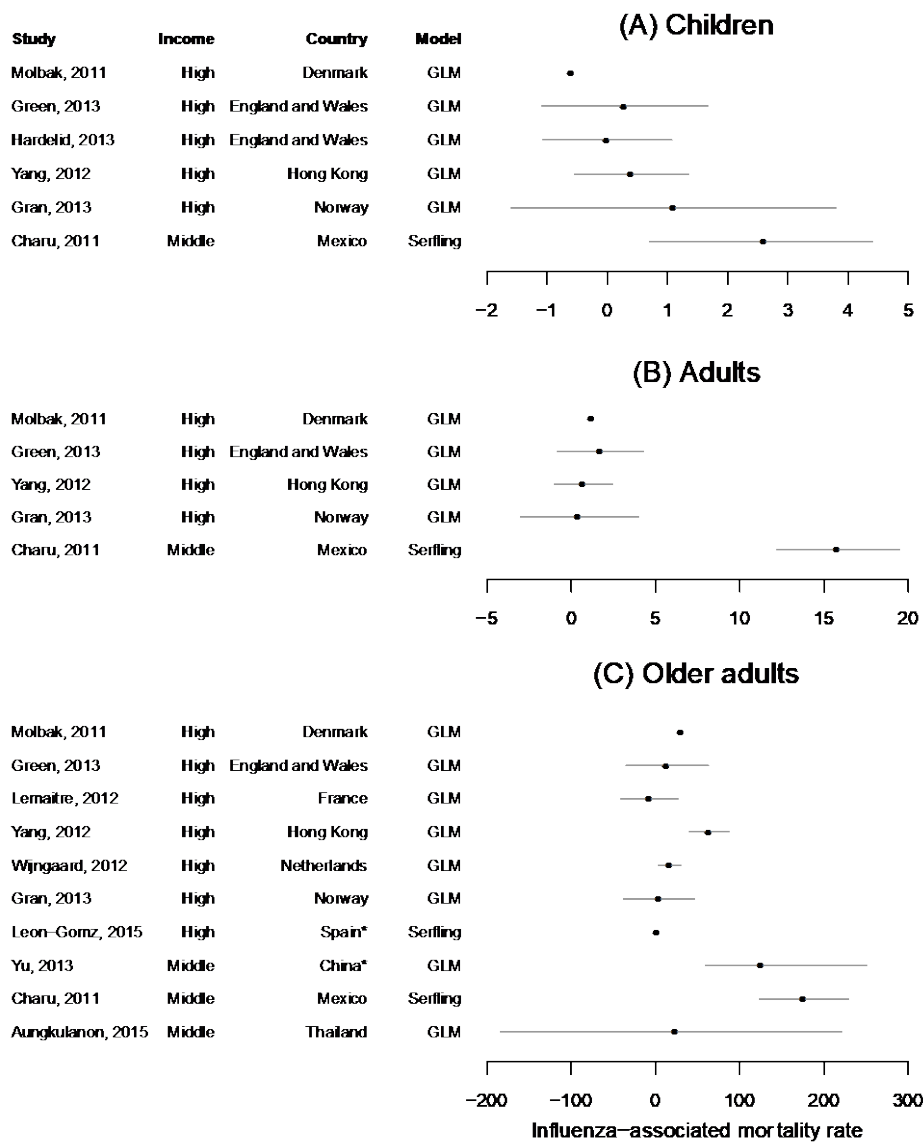

**Web Figure 9.** Annual age-specific influenza-associated excess all-cause mortality rates in the 2009 pandemic periods. (A) Estimates for children (Cochran's  $Q$  for GLM:  $Q = 6, P = 0.227$ ). (B) Estimates for adults. (C) Estimates for older adults (Cochran's  $Q$  for GLM:  $Q = 20, P = 0.005$ ). Europe\* is 8 European Countries including Belgium, Denmark, Greece, Hesse (region of Germany), Malta, the Netherlands, Sweden and Switzerland. Spain\* means 52 provincial capitals in Spain. China\* represents 128 sites in China. Serfling, Serfling-type model; GLM, generalized linear model.

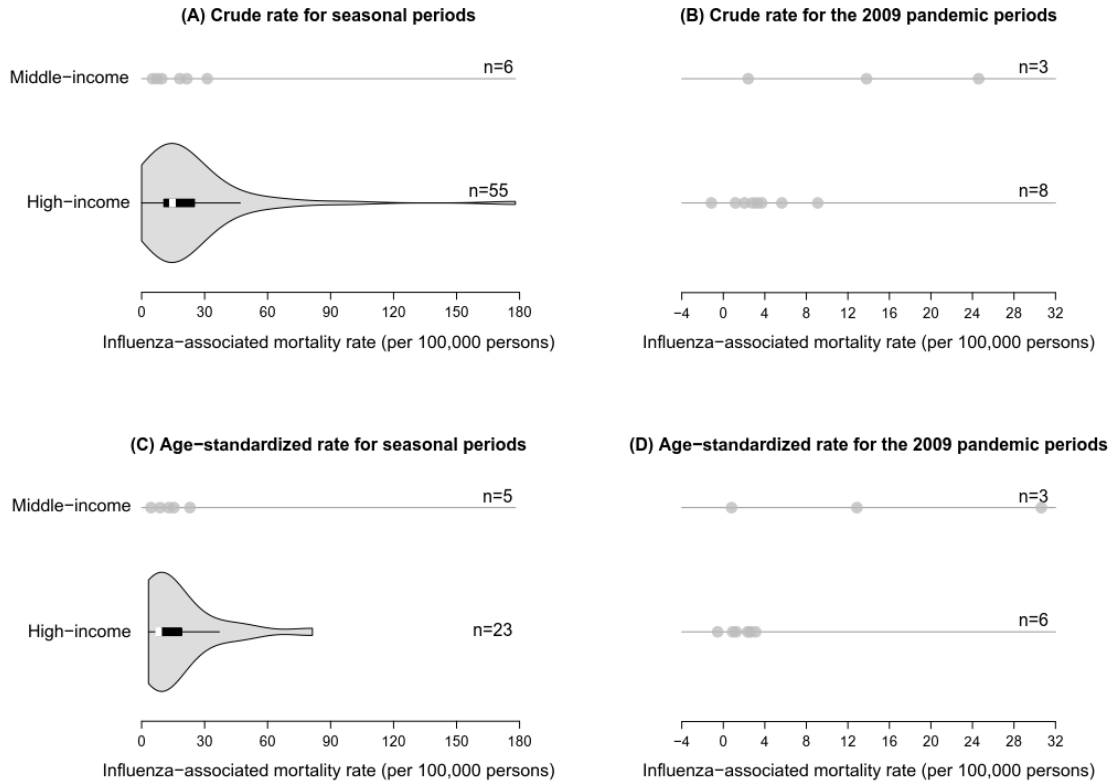

**Web Figure 10.** Annual crude and age-standardized all-cause influenza-associated excess mortality rates by income level. A violin plot was used when the number of estimates is equal to or larger than ten; the original estimate was plotted when there were less than ten estimates reported. (A) Annual crude influenza-associated all-cause excess mortality rates for seasonal periods. (B) Annual crude influenza-associated all-cause excess mortality rates for the 2009 pandemic periods. (C) Annual age-standardized influenza associated all-cause excess mortality rates for seasonal periods. (D) Annual age-standardized influenza associated all-cause excess mortality rates for the 2009 pandemic period.

**Web Table 2.** Description of the Multiplier Methods Used in the Included

Studies

| Reference          | Description                                                                                                                                                                                                                                                                                                                                                                                                                                                                                                                                                                                                                                                                                                                                          |
|--------------------|------------------------------------------------------------------------------------------------------------------------------------------------------------------------------------------------------------------------------------------------------------------------------------------------------------------------------------------------------------------------------------------------------------------------------------------------------------------------------------------------------------------------------------------------------------------------------------------------------------------------------------------------------------------------------------------------------------------------------------------------------|
| Dawood 2012 (19)   | $Num_D = sAR \times sCFR \times RMM \times Num_{pop}$ <p><i>sAR</i>: the percentage of population who developed a symptomatic respiratory illness associated with laboratory-confirmed 2009 pandemic influenza A H1N1<br/> <i>sCFR</i>: the percentage of individuals with symptomatic respiratory illness associated with laboratory-confirmed 2009 pandemic influenza A H1N1 who died<br/> <i>RMM</i>: risk-group-specific respiratory mortality multiplier<br/> <i>Num<sub>pop</sub></i>: population size<br/> <i>Num<sub>D</sub></i>: number of deaths attributable to influenza</p>                                                                                                                                                             |
| Presanis 2011 (63) | $Num_{Inf} = C_{Inf pop} \times Num_{pop}$ $Num_S = C_{S Inf} \times Num_{Inf}$ $Num_H = C_{H S} \times Num_S$ $Num_D = C_{D H} \times Num_H$ <p><i>Num<sub>pop</sub></i>: population size<br/> <i>C<sub>Inf pop</sub></i>: infection attack rate<br/> <i>Num<sub>Inf</sub></i>: number of infections<br/> <i>C<sub>S Inf</sub></i>: proportion of symptomatic infections<br/> <i>Num<sub>S</sub></i>: number of symptomatic infections<br/> <i>C<sub>H S</sub></i>: symptomatic case hospitalization ratio<br/> <i>Num<sub>H</sub></i>: number of hospitalizations<br/> <i>C<sub>D H</sub></i>: deaths to hospitalizations ratio<br/> <i>Num<sub>D</sub></i>: number of deaths attributable to influenza</p>                                        |
| Reed 2015 (65)     | $Rate_M = Rate_H \times Multiplier_U \times Ratio_{DH}$ $Num_D = Rate_M \times Num_{pop}$ <p><i>Rate<sub>H</sub></i>: influenza hospitalization rates<br/> <i>Multiplier<sub>U</sub></i>: the multiplier for under-detection<br/> <i>C<sub>D H</sub></i>: deaths to hospitalizations ratio<br/> <i>Rate<sub>M</sub></i>: influenza mortality rates<br/> <i>Num<sub>pop</sub></i>: population size<br/> <i>Num<sub>D</sub></i>: number of deaths attributable to influenza</p>                                                                                                                                                                                                                                                                        |
| Shrestha 2011 (72) | $Num_H = \frac{Rate_{H_M} \times Num_{pop_M}}{100,000}$ $Num_D = Num_H \times Multiplier_R \times C_{D H}$ <p><i>Rate<sub>H</sub></i>: median influenza hospitalization rates<br/> <i>Rate<sub>H_M</sub></i>: <i>Rate<sub>H</sub></i> from Emerging Infections Program (EIP) sites categorized as having mid-range level of hospitalizations<br/> <i>Num<sub>H</sub></i>: median number of hospitalizations<br/> <i>Multiplier<sub>R</sub></i>: the multiplier for under-reporting<br/> <i>C<sub>D H</sub></i>: deaths to hospitalizations ratio<br/> <i>Num<sub>D</sub></i>: median number of deaths attributable to influenza<br/> <i>Num<sub>pop_M</sub></i>: population of the state categorized as having “mid” level of influenza activity</p> |

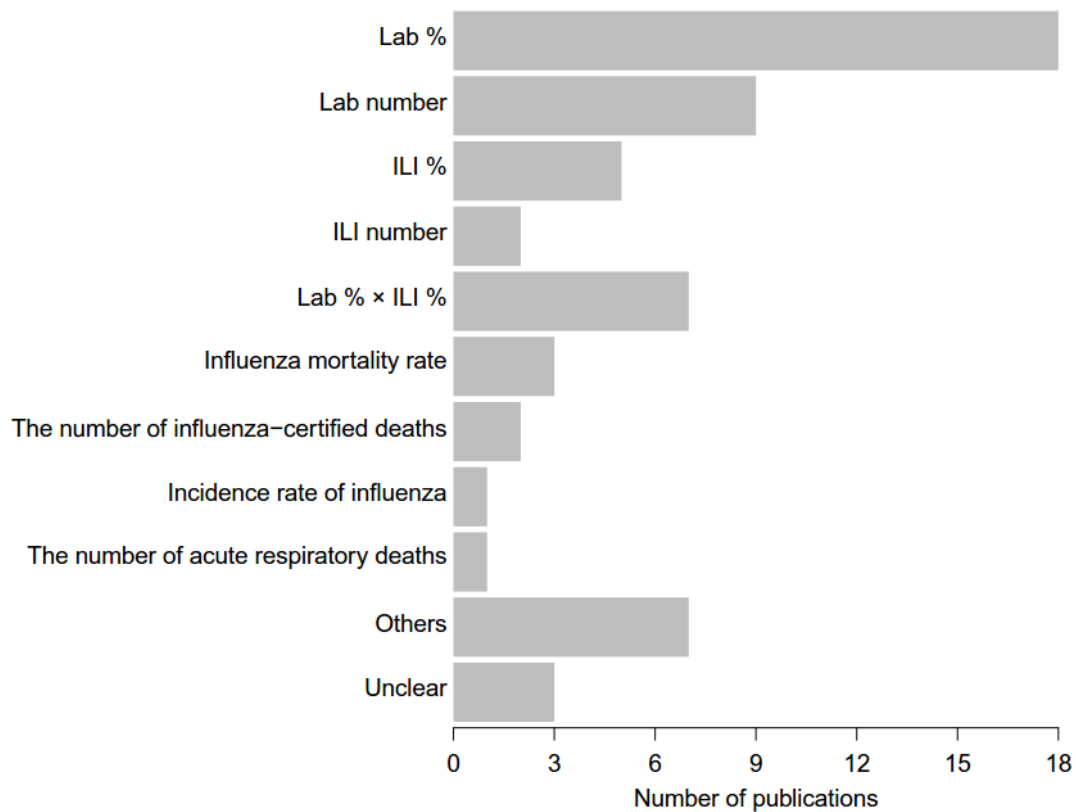

**Web Figure 11.** Frequency of usage of different influenza activity proxies in the regression models for estimation of influenza-associated excess mortality in the selected studies. Some studies used more than one proxy, so totals exceed 54. Lab % refers to the proportion of laboratory samples testing positive for influenza. Lab number represents the number of laboratory samples testing positive for influenza. ILI % is the proportion of ambulatory consultations for influenza-like illness (ILI). ILI number refers to the number of ambulatory consultations for influenza-like illness. Others include Lab % × normalized number of outpatient visits due to ILI, number of laboratory-confirmed influenza A infections, a variation of ILI % (i.e. a product of ILI % of a specific influenza season and a random number following a normal distribution, the mean and standard deviation of which are the same as the ILI % over the same influenza season), mixed proxies used for different types of influenza viruses (i.e. influenza A: a combination of laboratory positive tests and the number of hospital admissions with laboratory-confirmation of influenza; influenza B: Lab %), and rate of clinical influenza.



## Web Appendix 2. Statistical models used in the included studies (except for the multiplier method)

### 2.1 Regression models with an influenza activity proxy

Studies applying generalized linear models (GLM) (including generalized additive models) incorporated an influenza activity proxy into the model and adopted various ways to control for seasonality. Other relevant covariates could also be included in the model. The basic formula of GLM is:

$$Y_t \sim D(\mu_t)$$
$$g(\mu_t) = \beta_0 + \sum_{i=1}^m \beta_i flu_{it} + f(t) + \sum_{j=1}^k q_j(z_{jt}) \quad (3)$$

where  $Y_t$  represents the number of deaths or the death rate at time  $t$  with a mean of  $\mu_t$ .  $D$  is the distribution of  $Y_t$ .  $g(\cdot)$  represents the link function of  $\mu_t$ .  $flu_{it}$  is the  $i$ th influenza activity proxy at time  $t$ ;  $m$  is the number of proxies;  $f$  is the function of the time variable  $t$ ;  $z_{jt}$  represents observed time-varying variables such as temperature and humidity at time  $t$ ;  $k$  is the number of time-varying covariates;  $q_j$  is a function of those variables.

Studies used various methods to control for unmeasured confounding. For example, some studies (29, 30, 61, 99-101) used a spline function of time, while Dushoff et al. (20) and Yang et al. (102) detrended data before fitting models. Twenty-one out of 54 studies used a polynomial function of time to control for trends in mortality, and sine and cosine functions of time to control for the seasonality of mortality. Among studies using regression

models with an influenza activity proxy, only three studies applied Bayesian statistics (18, 24, 25) to estimate the mortality burden due to influenza. Eight studies (50, 54, 69, 70, 84, 85, 92, 98) used a Poisson distribution with an identity link, while seven studies applied a negative binomial distribution among which four studies (5, 14, 25, 53) used an identity link function and three (12, 47, 103) applied a log link function. To deal with autocorrelation in time series modeling, Wijngaard et al. (92) used a generalized estimating equation (GEE), some studies (18, 26, 61, 64, 99-101) assumed the error followed an autoregressive (AR) process and one study (9) assumed the error followed an ARIMA process.

Nicholson (56) used two regression models to estimate influenza-associated mortality, with the predicted outcome of the first regression model as the dependent variable of a second regression model.

## 2.2 Serfling-type models

In this review, we defined Serfling-type models as regression models with Fourier terms but without an influenza activity proxy. The basic Serfling-type model can be expressed as follows:

$$Y_t \sim D(\mu_t)$$

$$g(\mu_t) = \beta_0 + \sum_{i=1}^m \beta_i t^i + \sum_{j=1}^k \left( \beta_{1j} \sin\left(\frac{2\pi jt}{T}\right) + \beta_{2j} \cos\left(\frac{2\pi jt}{T}\right) \right)$$

where  $Y_t$  represents the number of deaths or the death rate at time  $t$  with a mean of  $\mu_t$ .  $D$  is the distribution of  $Y_t$ .  $g(\cdot)$  represents the link function of  $\mu_t$ .  $m$  is the order of polynomial components included in the model.  $\beta_i$  is the coefficient for

polynomial  $i$ . The right hand side of the equation is used to model the seasonal pattern of mortality.  $\beta_{1j}$  and  $\beta_{2j}$  are the coefficients for  $\sin(\frac{2\pi jt}{T})$  and  $\cos(\frac{2\pi jt}{T})$ , respectively where  $\pi$  is the mathematical constant.  $k$  is an integer that is smaller than or equal to  $T/2$ , but in the studies reviewed was commonly set to 1 or 2.  $T$  represents the number of time units within a time-series cycle.

### **2.3 Other methods**

Some studies used non-Serfling regression to estimate the influenza-associated mortality without incorporating influenza activity data into the model. To estimate the deaths attributable to influenza irrespective of the epidemic period, Kyncl et al. (37) applied a survival analysis method treating data as left censored and incorporating age group into the model. Six studies (13, 21, 32, 59, 79, 87) used an autoregressive integrated moving average (ARIMA) model for the estimation of baseline mortality. One study (79) used a transfer function taking age group into account to estimate excess mortality.

Other estimation techniques used in the selected studies included the moving average method, the relative mortality distribution model, and the incidence rate-difference method.

## References

1. Ahmad O, Boschi-Pinto C, Lopez A, et al. Age standardization of rates: a new WHO standard. <http://www.who.int/healthinfo/paper31.pdf>. Accessed April 28, 2016.
2. Alling DW, Blackwelder WC, Stuart-Harris CH. A study of excess mortality during influenza epidemics in the United States, 1968-1976. *Am J Epidemiol*. 1981;113(1):30-43.
3. Andreasen V, Simonsen L. The perils of using annual all-cause mortality data to estimate pandemic influenza burden. *Vaccine*. 2011;29 Suppl 2:B49-55.
4. Ansart S, Pelat C, Boelle PY, et al. Mortality burden of the 1918-1919 influenza pandemic in Europe. *Influenza Other Respir Viruses*. 2009;3(3):99-106.
5. Aungkulanon S, Cheng PY, Kusreesakul K, et al. Influenza-associated mortality in Thailand, 2006-2011. *Influenza Other Respir Viruses*. 2015;9(6):298-304.
6. Azziz-Baumgartner E, Cabrera AM, Cheng PY, et al. Incidence of influenza-associated mortality and hospitalizations in Argentina during 2002-2009. *Influenza Other Respir Viruses*. 2013;7(5):710-717.
7. Bonmarin I, Belchior E, Levy-Bruhl D. Impact of influenza vaccination on mortality in the French elderly population during the 2000-2009 period. *Vaccine*. 2015;33(9):1099-1101.
8. Brinkhof MW, Spoerri A, Birrer A, et al. Influenza-attributable mortality among the elderly in Switzerland. *Swiss Med Wkly*. 2006;136(19-20):302-309.
9. Carrat F, Valleron AJ. Influenza mortality among the elderly in France, 1980-90: how many deaths may have been avoided through vaccination? *J Epidemiol Community Health*. 1995;49(4):419-425.

10. Charu V, Chowell G, Palacio Mejia LS, et al. Mortality burden of the A/H1N1 pandemic in Mexico: a comparison of deaths and years of life lost to seasonal influenza. *Clin Infect Dis*. 2011;53(10):985-993.
11. Charu V, Simonsen L, Lustig R, et al. Mortality burden of the 2009-10 influenza pandemic in the United States: improving the timeliness of influenza severity estimates using inpatient mortality records. *Influenza Other Respir Viruses*. 2013;7(5):863-871.
12. Cheng PY, Palekar R, Azziz-Baumgartner E, et al. Burden of influenza-associated deaths in the Americas, 2002-2008. *Influenza Other Respir Viruses*. 2015;9 Suppl 1:13-21.
13. Choi K, Thacker SB. Mortality during influenza epidemics in the United States, 1967-1978. *Am J Public Health*. 1982;72(11):1280-1283.
14. Chow A, Ma S, Ling AE, et al. Influenza-associated deaths in tropical Singapore. *Emerg Infect Dis*. 2006;12(1):114-121.
15. Chowell G, Erkoreka A, Viboud C, et al. Spatial-temporal excess mortality patterns of the 1918-1919 influenza pandemic in Spain. *BMC Infect Dis*. 2014;14:371.
16. Cohen C, Simonsen L, Kang JW, et al. Elevated influenza-related excess mortality in South African elderly individuals, 1998-2005. *Clin Infect Dis*. 2010;51(12):1362-1369.
17. Collins SD, Lehmann J. Excess deaths from influenza and pneumonia and from important chronic diseases during epidemic periods, 1918-51. *Public Health Monogr*. 1953;10:1-21.
18. Cooper BS, Kotirum S, Kulpeng W, et al. Mortality attributable to seasonal influenza A and B infections in Thailand, 2005-2009: a longitudinal study. *Am J Epidemiol*. 2015;181(11):898-907.

19. Dawood FS, Iuliano AD, Reed C, et al. Estimated global mortality associated with the first 12 months of 2009 pandemic influenza A H1N1 virus circulation: a modelling study. *Lancet Infect Dis*. 2012;12(9):687-695.
20. Dushoff J, Plotkin JB, Viboud C, et al. Mortality due to influenza in the United States--an annualized regression approach using multiple-cause mortality data. *Am J Epidemiol*. 2006;163(2):181-187.
21. Egger M, Jennings S, Spuhler T, et al. [Mortality in influenza epidemics in Switzerland 1969-1985]. *Schweiz Med Wochenschr*. 1989;119(13-14):434-439.
22. Fleming DM. The contribution of influenza to combined acute respiratory infections, hospital admissions, and deaths in winter. *Commun Dis Public Health*. 2000;3(1):32-38.
23. Fleming DM, Pannell RS, Cross KW. Mortality in children from influenza and respiratory syncytial virus. *J Epidemiol Community Health*. 2005;59(7):586-590.
24. Foppa IM, Hossain MM. Revised estimates of influenza-associated excess mortality, United States, 1995 through 2005. *Emerg Themes Epidemiol*. 2008;5:26.
25. Foppa IM, Cheng PY, Reynolds SB, et al. Deaths averted by influenza vaccination in the U.S. during the seasons 2005/06 through 2013/14. *Vaccine*. 2015;33(26):3003-3009.
26. Goldstein E, Viboud C, Charu V, et al. Improving the estimation of influenza-related mortality over a seasonal baseline. *Epidemiology*. 2012;23(6):829-838.
27. Gran JM, Iversen B, Hungnes O, et al. Estimating influenza-related excess mortality and reproduction numbers for seasonal influenza in Norway, 1975-2004. *Epidemiol Infect*. 2010;138(11):1559-1568.

28. Gran JM, Kacelnik O, Grijbovski AM, et al. Counting pandemic deaths: comparing reported numbers of deaths from influenza A(H1N1)pdm09 with estimated excess mortality. *Influenza Other Respir Viruses*. 2013;7(6):1370-1379.
29. Green HK, Andrews N, Fleming D, et al. Mortality attributable to influenza in England and Wales prior to, during and after the 2009 pandemic. *PLoS One*. 2013;8(12):e79360.
30. Hardelid P, Pebody R, Andrews N. Mortality caused by influenza and respiratory syncytial virus by age group in England and Wales 1999-2010. *Influenza Other Respir Viruses*. 2013;7(1):35-45.
31. Housworth J, Langmuir AD. Excess mortality from epidemic influenza, 1957-1966. *Am J Epidemiol*. 1974;100(1):40-48.
32. Imaz MS, Eimann M, Poyard E, et al. [Influenza associated excess mortality in Argentina: 1992-2002]. *Rev Chilena Infectol*. 2006;23(4):297-306.
33. Ivan A, Freund S, Ionescu T, et al. [Problem of excess mortality in influenza]. *Viata Medicala*. 1969;16(21):1483-1491.
34. Jansen AG, Sanders EA, Hoes AW, et al. Influenza- and respiratory syncytial virus-associated mortality and hospitalisations. *Eur Respir J*. 2007;30(6):1158-1166.
35. Kessaram T, Stanley J, Baker MG. Estimating influenza-associated mortality in New Zealand from 1990 to 2008. *Influenza Other Respir Viruses*. 2015;9(1):14-19.
36. Kuo HW, Schmid D, Liu YL, et al. Influenza-related excess mortality, Austria 2001 till 2009. *Wien Klin Wochenschr*. 2011;123(19-20):593-598.
37. Kyncl J, Prochazka B, Goddard NL, et al. A study of excess mortality during influenza epidemics in the Czech Republic, 1982-2000. *Eur J Epidemiol*. 2005;20(4):365-371.

38. Lee VJ, Chen MI, Chan SP, et al. Influenza pandemics in Singapore, a tropical, globally connected city. *Emerg Infect Dis.* 2007;13(7):1052-1057.
39. Lee VJ, Yap J, Ong JB, et al. Influenza excess mortality from 1950-2000 in tropical Singapore. *PLoS One.* 2009;4(12):e8096.
40. Lemaitre M, Carrat F, Rey G, et al. Mortality burden of the 2009 A/H1N1 influenza pandemic in France: comparison to seasonal influenza and the A/H3N2 pandemic. *PLoS One.* 2012;7(9):e45051.
41. Leon-Gomez I, Delgado-Sanz C, Jimenez-Jorge S, et al. [Excess mortality associated with influenza in Spain in winter 2012]. *Gac Sanit.* 2015;29(4):258-265.
42. Li CK, Choi BC, Wong TW. Influenza-related deaths and hospitalizations in Hong Kong: a subtropical area. *Public Health.* 2006;120(6):517-524.
43. Linhart Y, Shohat T, Bromberg M, et al. Excess mortality from seasonal influenza is negligible below the age of 50 in Israel: implications for vaccine policy. *Infection.* 2011;39(5):399-404.
44. Lopez-Cuadrado T, de Mateo S, Jimenez-Jorge S, et al. Influenza-related mortality in Spain, 1999-2005. *Gac Sanit.* 2012;26(4):325-329.
45. Lui KJ, Kendal AP. Impact of influenza epidemics on mortality in the United States from October 1972 to May 1985. *Am J Public Health.* 1987;77(6):712-716.
46. Mamelund SE, Iversen BG. [Morbidity and mortality in pandemic influenza in Norway]. *Tidsskr Nor Laegeforen.* 2000;120(3):360-363.
47. Mann AG, Mangtani P, Russell CA, et al. The impact of targeting all elderly persons in England and Wales for yearly influenza vaccination: excess mortality due to pneumonia or influenza and time trend study. *BMJ Open.* 2013;3(8):e002743.
48. Matias G, Taylor R, Haguinet F, et al. Estimates of mortality attributable to influenza and RSV in the United States during 1997-2009 by influenza type or



- subtype, age, cause of death, and risk status. *Influenza Other Respir Viruses*. 2014;8(5):507-515.
49. Mazick A, Gergonne B, Wuillaume F, et al. Higher all-cause mortality in children during autumn 2009 compared with the three previous years: pooled results from eight European countries. *Euro Surveill*. 2010;15(5):pii=19480.
  50. Molbak K, Widgren K, Jensen KS, et al. Burden of illness of the 2009 pandemic of influenza A (H1N1) in Denmark. *Vaccine*. 2011;29 Suppl 2:B63-69.
  51. Murray CJ, Lopez AD, Chin B, et al. Estimation of potential global pandemic influenza mortality on the basis of vital registry data from the 1918-20 pandemic: a quantitative analysis. *Lancet*. 2006;368(9554):2211-2218.
  52. Muscatello DJ, Newall AT, Dwyer DE, et al. Mortality attributable to seasonal and pandemic influenza, Australia, 2003 to 2009, using a novel time series smoothing approach. *PLoS One*. 2014;8(6):e64734.
  53. Newall AT, Wood JG, Macintyre CR. Influenza-related hospitalisation and death in Australians aged 50 years and older. *Vaccine*. 2008;26(17):2135-2141.
  54. Newall AT, Viboud C, Wood JG. Influenza-attributable mortality in Australians aged more than 50 years: a comparison of different modelling approaches. *Epidemiol Infect*. 2010;138(6):836-842.
  55. Nguyen AM, Noymer A. Influenza mortality in the United States, 2009 pandemic: burden, timing and age distribution. *PLoS One*. 2013;8(5):e64198.
  56. Nicholson KG. Impact of influenza and respiratory syncytial virus on mortality in England and Wales from January 1975 to December 1990. *Epidemiol Infect*. 1996;116(1):51-63.

57. Nielsen J, Mazick A, Glismann S, et al. Excess mortality related to seasonal influenza and extreme temperatures in Denmark, 1994-2010. *BMC Infect Dis.* 2011;11:350.
58. Nogueira PJ, Nunes B, Machado A, et al. Early estimates of the excess mortality associated with the 2008-9 influenza season in Portugal. *Euro Surveill.* 2009;14(18):pii=19194.
59. Nunes B, Viboud C, Machado A, et al. Excess mortality associated with influenza epidemics in Portugal, 1980 to 2004. *PLoS One.* 2011;6(6):e20661.
60. Ohmi K, Marui E. [Estimation of the excess death associated with influenza pandemics and epidemics in Japan after world war II: relation with pandemics and the vaccination system]. *Nihon Koshu Eisei Zasshi.* 2011;58(10):867-878.
61. Park M, Wu P, Goldstein E, et al. Influenza-associated excess mortality in South Korea. *Am J Prev Med.* 2016;50(4):e111-119.
62. Pitman RJ, Melegaro A, Gelb D, et al. Assessing the burden of influenza and other respiratory infections in England and Wales. *J Infect.* 2007;54(6):530-538.
63. Presanis AM, Pebody RG, Paterson BJ, et al. Changes in severity of 2009 pandemic A/H1N1 influenza in England: a Bayesian evidence synthesis. *BMJ.* 2011;343:d5408.
64. Quandelacy TM, Viboud C, Charu V, et al. Age- and sex-related risk factors for influenza-associated mortality in the United States between 1997-2007. *Am J Epidemiol.* 2014;179(2):156-167.
65. Reed C, Chaves SS, Daily Kirley P, et al. Estimating influenza disease burden from population-based surveillance data in the United States. *PLoS One.* 2015;10(3):e0118369.

66. Richard SA, Sugaya N, Simonsen L, et al. A comparative study of the 1918-1920 influenza pandemic in Japan, USA and UK: mortality impact and implications for pandemic planning. *Epidemiol Infect.* 2009;137(8):1062-1072.
67. Rizzo C, Viboud C, Montomoli E, et al. Influenza-related mortality in the Italian elderly: no decline associated with increasing vaccination coverage. *Vaccine.* 2006;24(42-43):6468-6475.
68. Rizzo C, Bella A, Viboud C, et al. Trends for influenza-related deaths during pandemic and epidemic seasons, Italy, 1969-2001. *Emerg Infect Dis.* 2007;13(5):694-699.
69. Schanzer DL, Tam TW, Langley JM, et al. Influenza-attributable deaths, Canada 1990-1999. *Epidemiol Infect.* 2007;135(7):1109-1116.
70. Schanzer DL, Sevenhuysen C, Winchester B, et al. Estimating influenza deaths in Canada, 1992-2009. *PLoS One.* 2013;8(11):e80481.
71. Serfling RE, Sherman IL, Houseworth WJ. Excess pneumonia-influenza mortality by age and sex in three major influenza A2 epidemics, United States, 1957-58, 1960 and 1963. *Am J Epidemiol.* 1967;86(2):433-441.
72. Shrestha SS, Swerdlow DL, Borse RH, et al. Estimating the burden of 2009 pandemic influenza A (H1N1) in the United States (April 2009-April 2010). *Clin Infect Dis.* 2011;52 Suppl 1:S75-82.
73. Simonsen L, Clarke MJ, Williamson GD, et al. The impact of influenza epidemics on mortality: introducing a severity index. *Am J Public Health.* 1997;87(12):1944-1950.
74. Simonsen L, Clarke MJ, Schonberger LB, et al. Pandemic versus epidemic influenza mortality: a pattern of changing age distribution. *J Infect Dis.* 1998;178(1):53-60.

75. Simonsen L, Reichert TA, Viboud C, et al. Impact of influenza vaccination on seasonal mortality in the US elderly population. *Arch Intern Med*. 2005;165(3):265-272.
76. Simonsen L, Spreeuwenberg P, Lustig R, et al. Global mortality estimates for the 2009 influenza pandemic from the GLaMOR project: a modeling study. *PLoS Med*. 2013;10(11):e1001558.
77. Simon Mendez L, Lopez-Cuadrado T, Lopez Perea N, et al. [Premature mortality excess related to influenza in Spain during an interpandemic period]. *Rev Esp Salud Publica*. 2012;86(2):153-163.
78. Sprenger MJ, Mulder PG, Beyer WE, et al. Impact of influenza on mortality in relation to age and underlying disease, 1967-1989. *Int J Epidemiol*. 1993;22(2):334-340.
79. Stroup DF, Thacker SB, Herndon JL. Application of multiple time series analysis to the estimation of pneumonia and influenza mortality by age 1962-1983. *Stat Med*. 1988;7(10):1045-1059.
80. Tachibana T, Kawaminami K, Minowa M. [Excess mortality from influenza epidemics in Japan, 1980-1994]. *Nihon Koshu Eisei Zasshi*. 1999;46(4):263-274.
81. Takahashi M, Tango T. [Comparative study of new method and the Kawai and Fukutomi methods for estimating excess mortality associated with influenza-epidemics, based upon national vital statistics from 1975 to 1997]. *Nippon koshu eisei zasshi*. 2001;48(10):816-826.
82. Takahashi M, Tango T. [Estimation of excess mortality associated with influenza-epidemics by age and cause specific death in Japan, 1975-1999]. *Nihon Eiseigaku Zasshi*. 2002;57(3):571-584.

83. Takahashi M, Nagai M. [Estimation of excess mortality associated with influenza epidemics specific for sex, age and cause of death in Japan during 1987-2005]. *Nihon Eiseigaku Zasshi*. 2008;63(1):5-19.
84. Tempia S, Walaza S, Viboud C, et al. Mortality associated with seasonal and pandemic influenza and respiratory syncytial virus among children <5 years of age in a high HIV prevalence setting--South Africa, 1998-2009. *Clin Infect Dis*. 2014;58(9):1241-1249.
85. Tempia S, Walaza S, Viboud C, et al. Deaths associated with respiratory syncytial and influenza viruses among persons  $\geq$  5 years of age in HIV-prevalent area, South Africa, 1998-2009(1). *Emerg Infect Dis*. 2015;21(4):600-608.
86. Thompson WW, Shay DK, Weintraub E, et al. Mortality associated with influenza and respiratory syncytial virus in the United States. *JAMA*. 2003;289(2):179-186.
87. Thompson WW, Weintraub E, Dhankhar P, et al. Estimates of US influenza-associated deaths made using four different methods. *Influenza Other Respir Viruses*. 2009;3(1):37-49.
88. Tillett HE, Smith JW, Clifford RE. Excess morbidity and mortality associated with influenza in England and Wales. *Lancet*. 1980;1(8172):793-795.
89. Tillett HE, Smith JW, Gooch CD. Excess deaths attributable to influenza in England and Wales: age at death and certified cause. *Int J Epidemiol*. 1983;12(3):344-352.
90. US Centers for Disease Control and Prevention. Estimates of deaths associated with seasonal influenza --- United States, 1976-2007. *MMWR Morb Mortal Wkly Rep*. 2010;59(33):1057-1062.
91. van Asten L, van den Wijngaard C, van Pelt W, et al. Mortality attributable to 9 common infections: significant effect of influenza A, respiratory syncytial virus,

- influenza B, norovirus, and parainfluenza in elderly persons. *J Infect Dis.* 2012;206(5):628-639.
92. Wijngaard CC, Asten L, Koopmans MP, et al. Comparing pandemic to seasonal influenza mortality: moderate impact overall but high mortality in young children. *PLoS One.* 2012;7(2):e31197.
93. Wielders CC, van Lier EA, van 't Klooster TM, et al. The burden of 2009 pandemic influenza A(H1N1) in the Netherlands. *Eur J Public Health.* 2012;22(1):150-157.
94. Viboud C, Grais RF, Lafont BA, et al. Multinational impact of the 1968 Hong Kong influenza pandemic: evidence for a smoldering pandemic. *J Infect Dis.* 2005;192(2):233-248.
95. Viboud C, Simonsen L, Fuentes R, et al. Global mortality impact of the 1957–1959 influenza pandemic. *J Infect Dis.* 2016;213(5):738-745.
96. Wong CM, Chan KP, Hedley AJ, et al. Influenza-associated mortality in Hong Kong. *Clin Infect Dis.* 2004;39(11):1611-1617.
97. Wong CM, Peiris JS, Yang L, et al. Effect of influenza on cardiorespiratory and all-cause mortality in Hong Kong, Singapore and Guangzhou. *Hong Kong Med J.* 2012;18 Suppl 2:8-11.
98. Wong JY, Wu P, Nishiura H, et al. Infection fatality risk of the pandemic A(H1N1)2009 virus in Hong Kong. *Am J Epidemiol.* 2013;177(8):834-840.
99. Wu P, Goldstein E, Ho LM, et al. Excess mortality associated with influenza A and B virus in Hong Kong, 1998-2009. *J Infect Dis.* 2012;206(12):1862-1871.
100. Wu P, Goldstein E, Ho LM, et al. Excess mortality impact of two epidemics of pandemic influenza A(H1N1pdm09) virus in Hong Kong. *Influenza Other Respir Viruses.* 2014;8(1):1-7.

101. Yang L, Ma S, Chen PY, et al. Influenza associated mortality in the subtropics and tropics: results from three Asian cities. *Vaccine*. 2011;29(48):8909-8914.
102. Yang L, Chan KP, Cowling BJ, et al. Excess mortality associated with the 2009 pandemic of influenza A(H1N1) in Hong Kong. *Epidemiol Infect*. 2012;140(9):1542-1550.
103. Yu H, Feng L, Viboud CG, et al. Regional variation in mortality impact of the 2009 A(H1N1) influenza pandemic in China. *Influenza Other Respir Viruses*. 2013;7(6):1350-1360.
104. Zucs P, Buchholz U, Haas W, et al. Influenza associated excess mortality in Germany, 1985-2001. *Emerg Themes Epidemiol*. 2005;2:6.
